# Supplementary material for: Bacterial Genes Outnumber Archaeal Genes in Eukaryotic Genomes
Source: PubMed Central journal article supplement (PMC7151554; doi:10.1093/gbe/evaa047), 2020-03-06
Supplement: evaa047_supplementary_data.pdf [file evaa047_supplementary_data.pdf]

## Overview of Supplementary information

| Name        | Content                                                                                            | SI | Website |
|-------------|----------------------------------------------------------------------------------------------------|----|---------|
| SI Figure 1 | Correlation of eukaryote genome size vs. number of homologous prokaryotic clusters                 | +  |         |
| SI Table 1a | Genome datasets (prokaryotes & eukaryotes), taxonomy, identifier, additional information           |    | +       |
| SI Table 1b | Prokaryotic sequence headers, sequence IDs                                                         |    | +       |
| SI Table 1c | Eukaryotic sequence headers, sequence IDs                                                          |    | +       |
| SI Table 2  | Eukaryote-prokaryote clusters & eukaryote-specific clusters                                        |    | +       |
| SI Table 3  | Numbers of assigned archaeal and bacterial homologs                                                |    | +       |
| SI Table 4  | KEGG annotation count for archaeal & bacterial assignments                                         |    | +       |
| SI Table 5  | Presence-absence matrix with organism sorting                                                      |    | +       |
| SI Table 6  | Archaeal, bacterial, eukaryote only clusters, clusters of whole prokaryotic clustering             |    | +       |
| SI Table 7  | 1,000 subsamples of bacterial datasets for assignment of prokaryotic origin of eukaryote sequences |    | +       |
| SI Table 8a | KEGG sequences (v. September 2017)                                                                 |    | +       |
| SI Table 8b | KEGG BRITE hierarchy (v. September 2017)                                                           |    | +       |

Link to supplementary information on the website:

<http://www.molevol.de/resources/index.html>

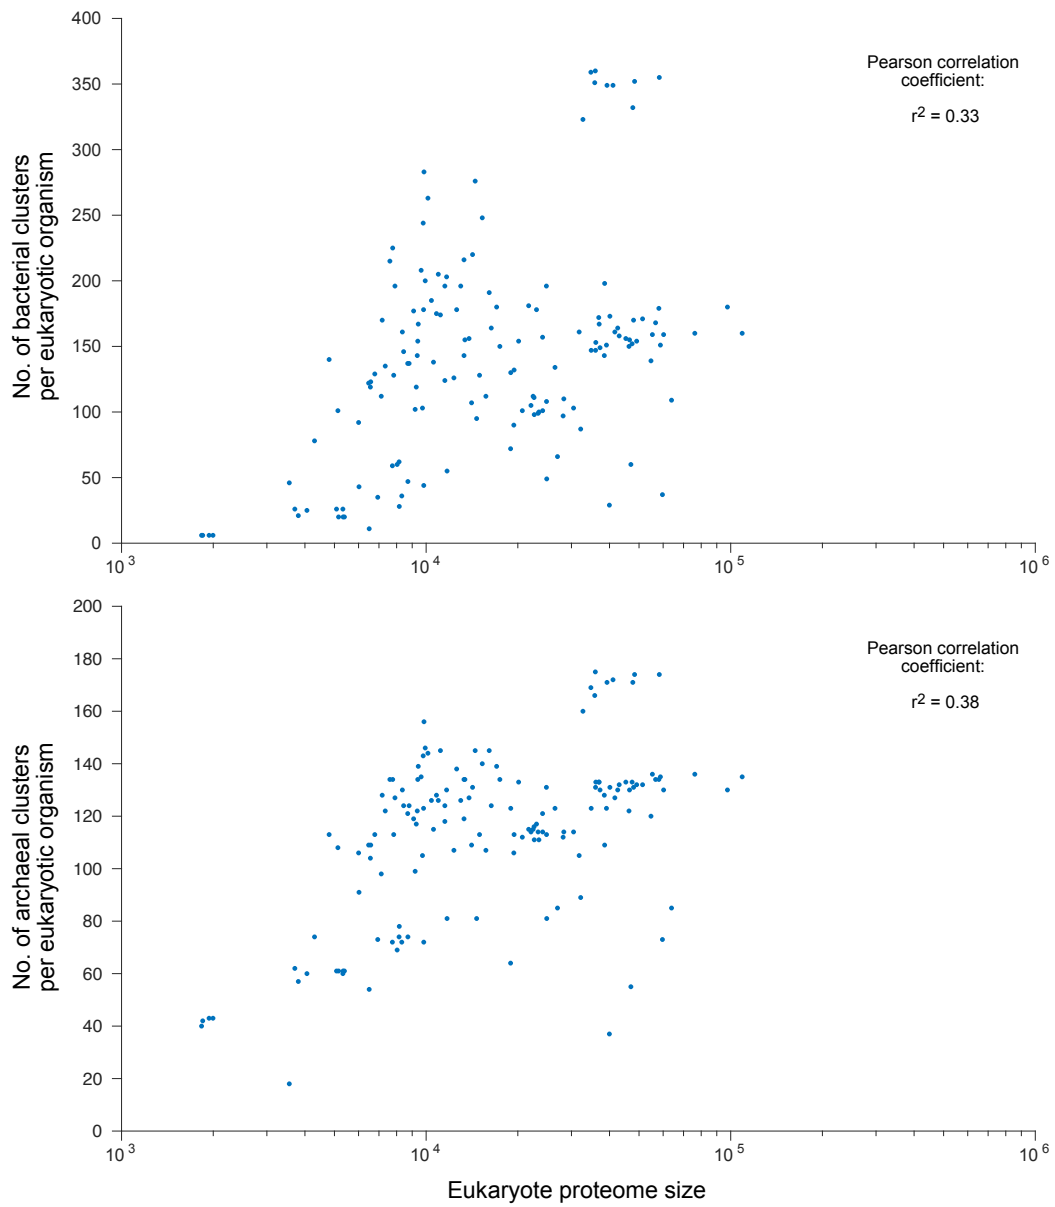

**Supplementary figure 1:** Correlation of eukaryote genome size vs. number of homologous prokaryotic clusters.
